# Supplementary material
Source: PubMed Central journal article supplement (PMC4882242)
Supplement: NIHMS774470-supplement-Supplemental_Data.pdf [file NIHMS774470-supplement-Supplemental_Data.pdf]

## Supplemental Figure I

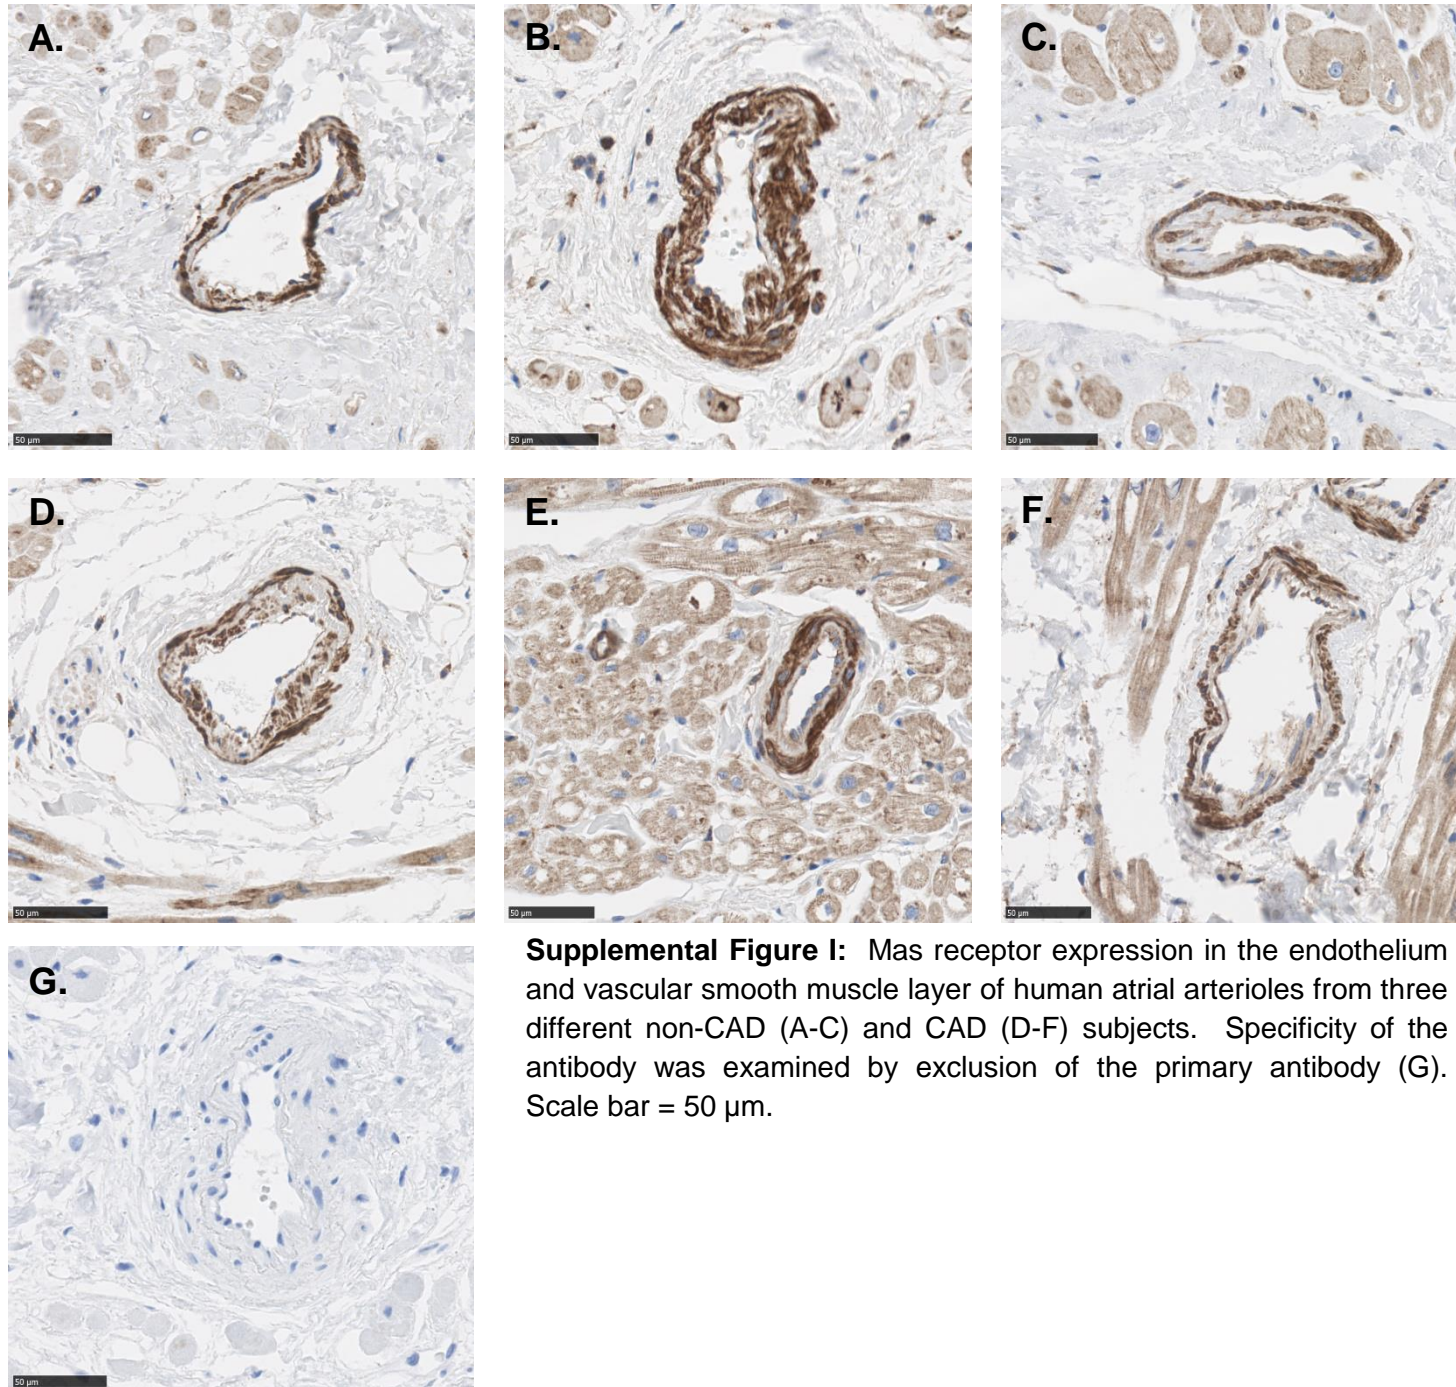

**Supplemental Figure I:** Mas receptor expression in the endothelium and vascular smooth muscle layer of human atrial arterioles from three different non-CAD (A-C) and CAD (D-F) subjects. Specificity of the antibody was examined by exclusion of the primary antibody (G). Scale bar = 50 µm.

## Supplemental Figure II

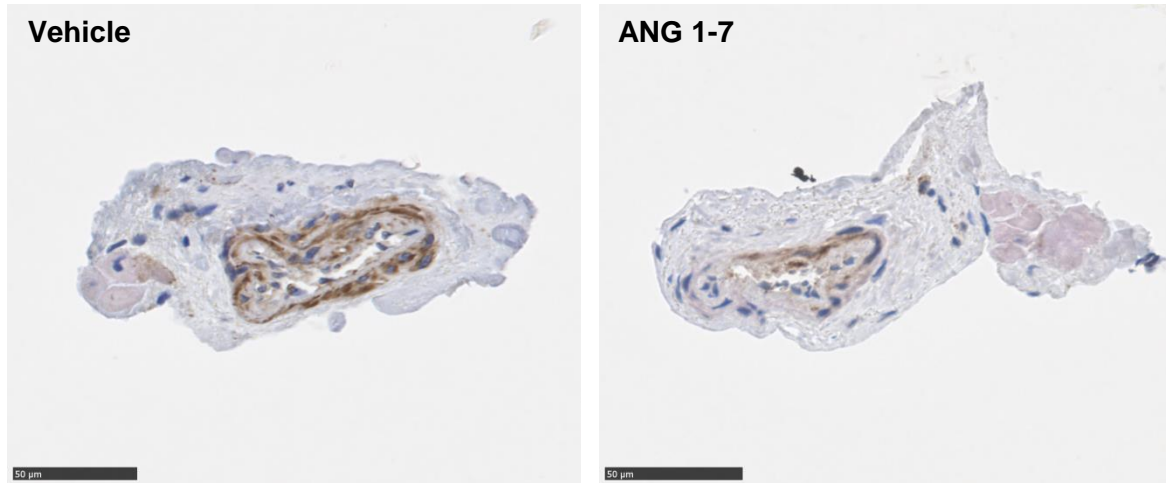

**Supplemental Figure II:** Mas receptor expression in the endothelium and vascular smooth muscle layer of human atrial arterioles from a single CAD subject treated either with ANG 1-7 ( $10^{-9}$  M) or vehicle overnight. Scale bar = 50 µm.

Supplemental Figure III

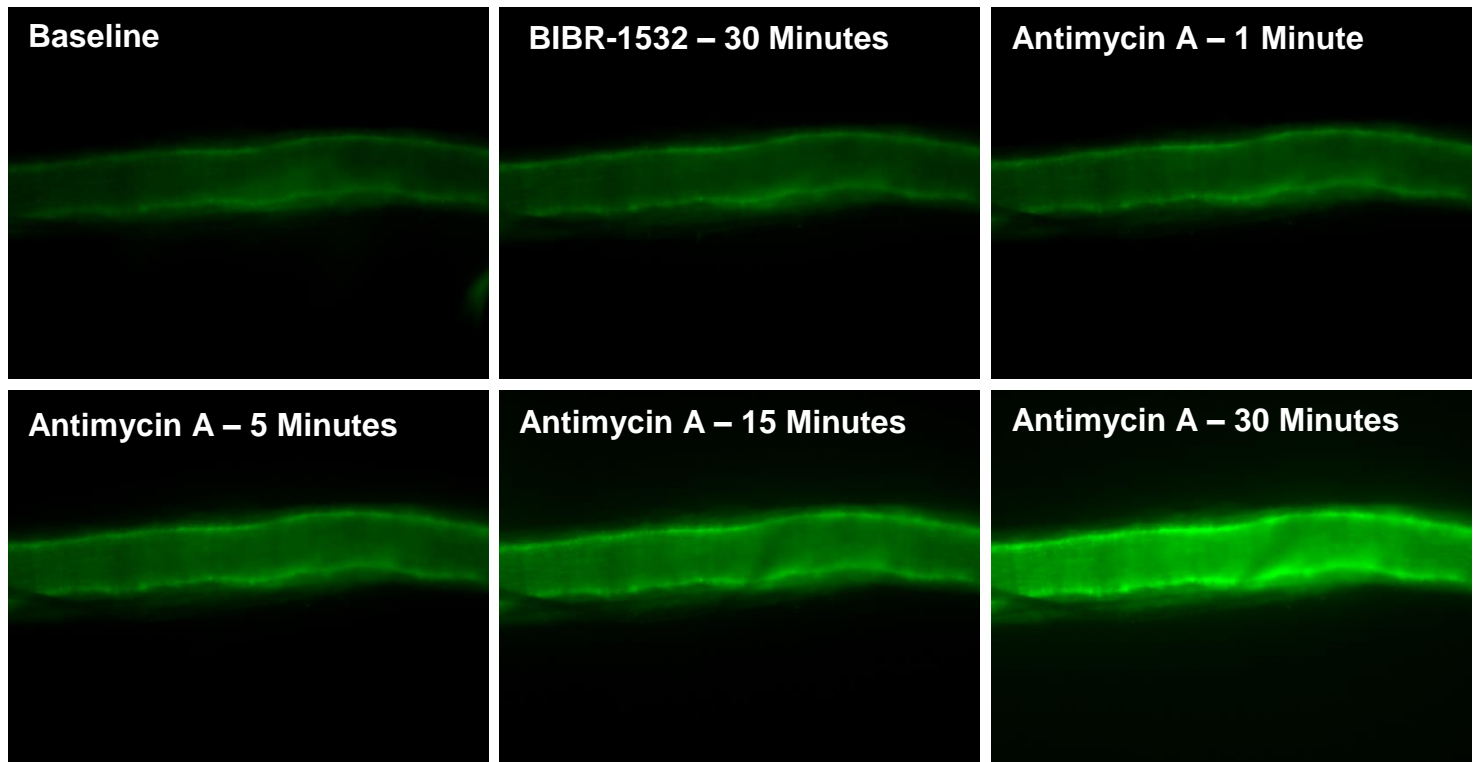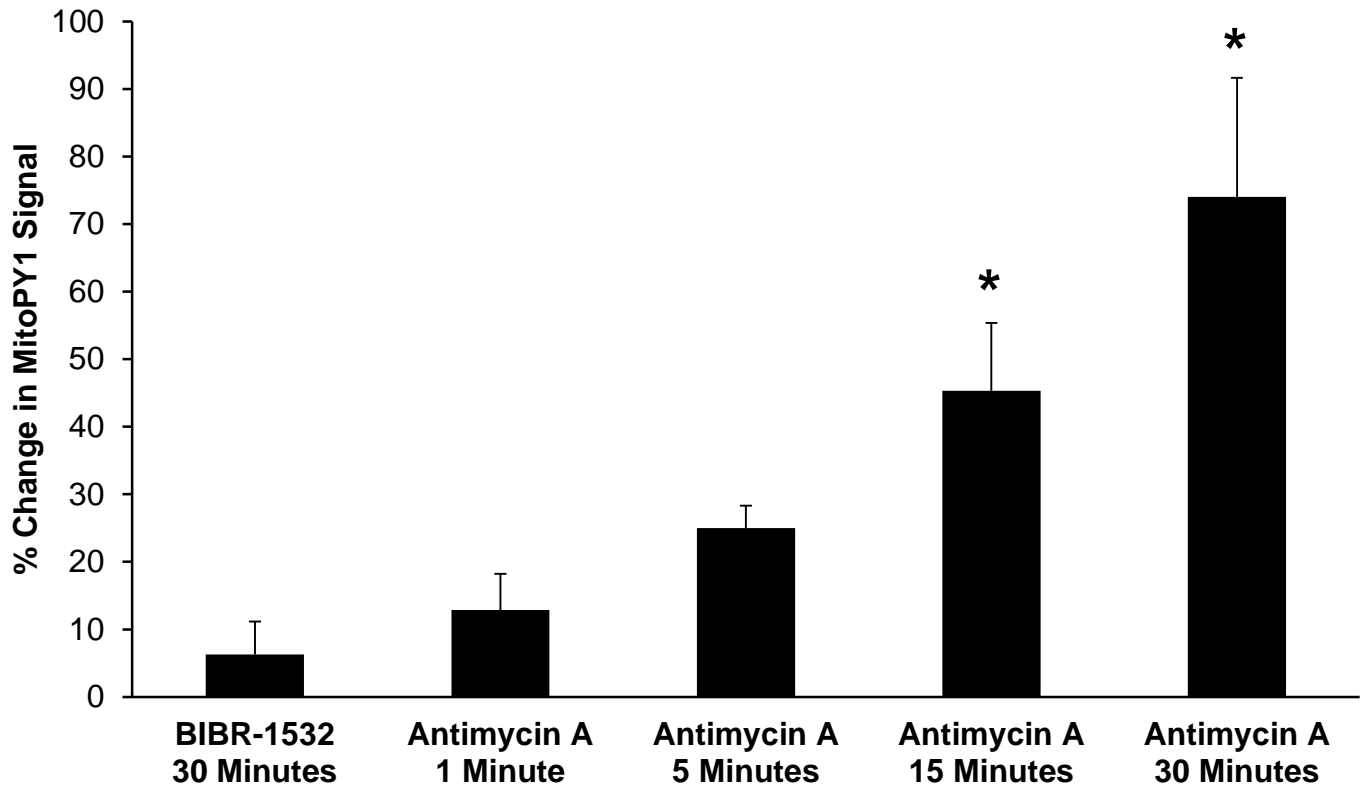

**Supplemental Figure III.** BIBR-1532 (10  $\mu$ M; n=5) had no effect on mitochondrial  $\text{H}_2\text{O}_2$  levels in isolated human adipose arterioles when it was added to the organ bath for 30 minutes. The mitochondrial electron transport chain uncoupler antimycin A (1  $\mu$ M; n=4) increased mitochondrial  $\text{H}_2\text{O}_2$  in a time-dependent manner. n=number of vessels, each from a different individual. \*P<0.05 vs. BIBR-1532, one-way ANOVA.

# Supplemental Figure IV

| 15 Subjects                 |        |
|-----------------------------|--------|
| Age (years)                 | 70±2.6 |
| Male/Female                 | 12/3   |
| Body Mass Index             | 26±2.5 |
| Underlying Condition        |        |
| Coronary Artery Disease     | 15     |
| Hypertension                | 14     |
| Valve Disease               | 2      |
| Atrial Fibrillation         | 0      |
| Peripheral Vascular Disease | 0      |
| Diabetes                    | 2      |
| Hyperlipidemia              | 8      |
| Tobacco Use                 | 2      |
| Cancer                      | 2      |
| Bowel Disease               | 1      |
| Adipose Depot               |        |
| Esophageal                  | 2      |
| Knee                        | 1      |
| Mesenteric                  | 5      |
| Omental                     | 1      |
| Pericardial                 | 4      |
| Subcutaneous                | 2      |

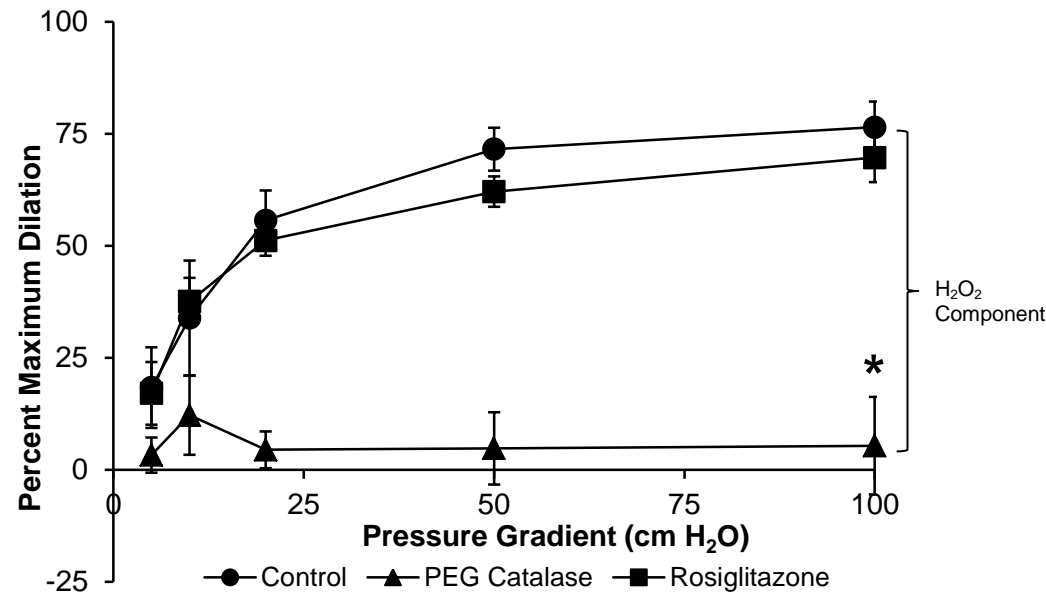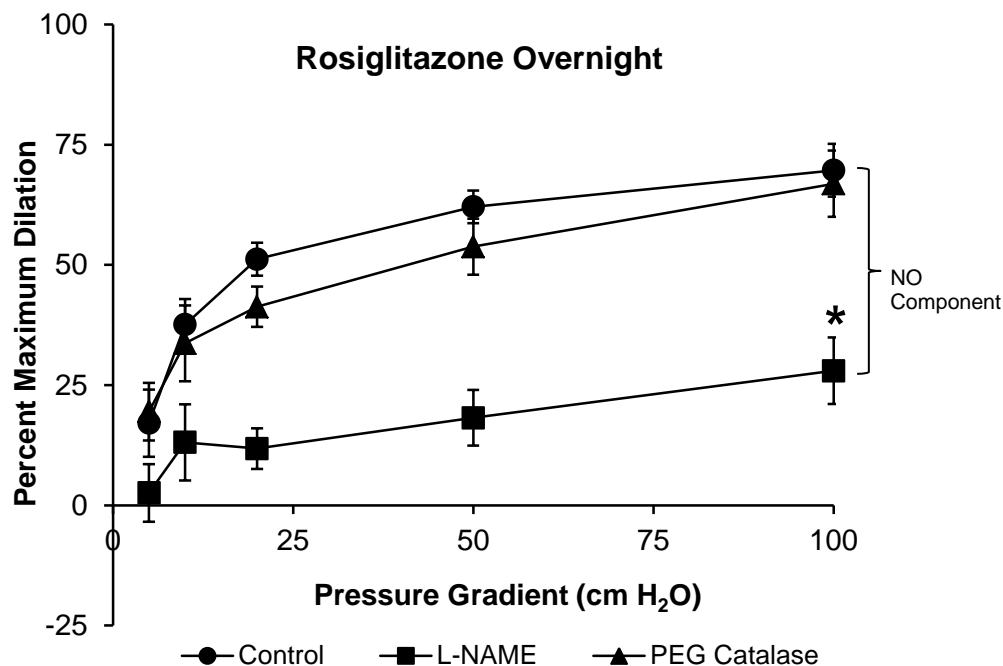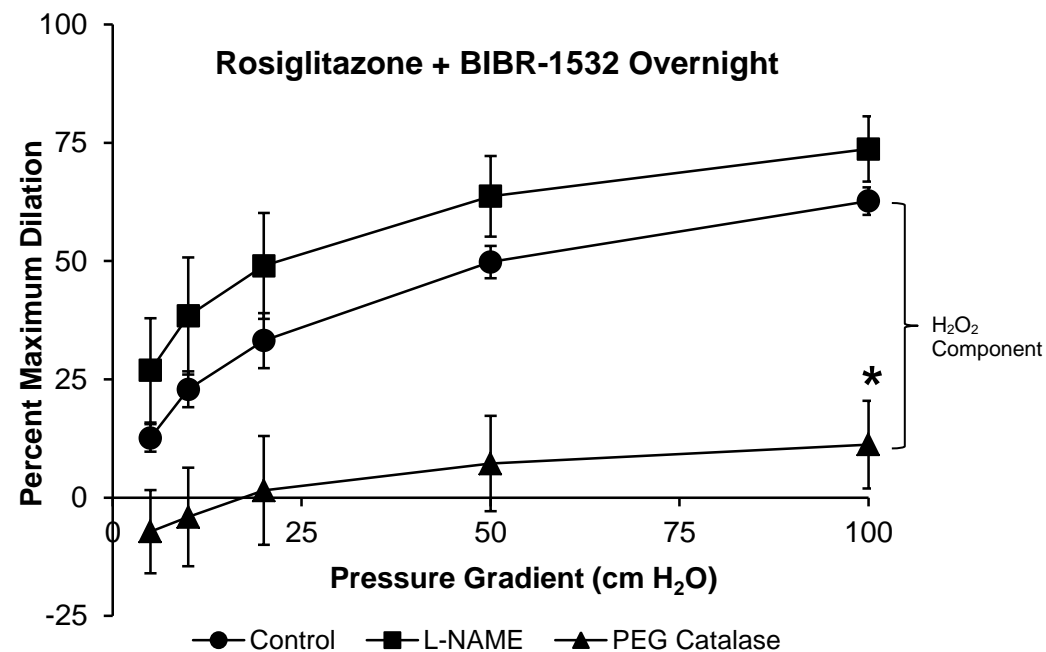

**Supplemental Figure IV.** Tissue from 15 subjects with CAD was used to examine the effects of rosiglitazone (a PPAR $\gamma$  activator) on FMD in adipose arterioles. Overnight rosiglitazone (10  $\mu$ M) treatment had no effect on the magnitude of dilatation (top, right), but restored the NO-component of dilatation in arterioles from subjects with CAD (bottom, left). When the telomerase inhibitor BIBR-1532 (10  $\mu$ M) was co-incubated with rosiglitazone, NO-mediated dilatation was no longer restored (bottom, right). n=4-7, all groups. \*P<0.05 vs. Control.
